# Supplementary material
Source: PubMed Central journal article supplement (PMC7560977)
Supplement: NIHMS1041726-supplement-Supplemental_Tables.pdf [file NIHMS1041726-supplement-Supplemental_Tables.pdf]

Table S1

*Number of Days Between Testing Occasions*

|                 | BOY-MOY     |           | MOY-EOY     |           |
|-----------------|-------------|-----------|-------------|-----------|
|                 | <i>Mean</i> | <i>SD</i> | <i>Mean</i> | <i>SD</i> |
| Grade 1 Reading | 123.53      | 5.99      | 123.44      | 6.34      |
| Grade 1 Math    | 124.76      | 6.03      | 123.93      | 6.55      |
| Grade 2 Reading | 119.26      | 8.81      | 127.86      | 8.02      |
| Grade 2 Math    | 123.78      | 6.15      | 123.35      | 5.77      |
| Grade 3 Reading | 119.01      | 8.37      | 131.13      | 6.96      |
| Grade 3 Math    | 123.21      | 7.78      | 125.81      | 6.21      |
| Grade 4 Reading | 114.66      | 6.76      | 131.01      | 7.24      |
| Grade 4 Math    | 124.03      | 6.92      | 126.75      | 7.43      |
| Grade 5 Reading | 115.11      | 5.82      | 135.31      | 5.26      |
| Grade 5 Math    | 124.87      | 5.73      | 122.85      | 6.54      |

Table S2

*Descriptive Statistics for Renaissance STAR Reading and Math Scores by Beginning-of-Year Quartile by Cohort*

|                    | Grade 1-2   |           |          | Grade 2-3   |           |          | Grade 3-4   |           |          | Grade 4-5   |           |          |
|--------------------|-------------|-----------|----------|-------------|-----------|----------|-------------|-----------|----------|-------------|-----------|----------|
|                    | <i>Mean</i> | <i>SD</i> | <i>N</i> |
| Y1 Reading BOY Q1  | 39.11       | 31.43     | 649      | 84.53       | 23.70     | 477      | 175.06      | 61.46     | 296      | 256.73      | 75.60     | 241      |
| Y1 Reading BOY Q2  | 72.98       | 1.98      | 262      | 177.46      | 27.52     | 357      | 311.06      | 27.99     | 380      | 409.69      | 31.47     | 280      |
| Y1 Reading BOY Q3  | 83.60       | 5.32      | 310      | 271.76      | 26.81     | 404      | 407.99      | 30.18     | 423      | 508.71      | 32.28     | 341      |
| Y1 Reading BOY Q4  | 211.37      | 105.13    | 311      | 412.75      | 80.13     | 396      | 554.13      | 86.98     | 418      | 701.61      | 128.62    | 367      |
| Y1 Reading BOY All | 88.88       | 82.52     | 1532     | 230.67      | 131.81    | 1634     | 378.53      | 145.72    | 1517     | 494.34      | 179.36    | 1229     |
| Y1 Reading MOY Q1  | 93.07       | 60.89     | 622      | 185.17      | 86.75     | 445      | 272.49      | 105.25    | 285      | 328.32      | 106.54    | 238      |
| Y1 Reading MOY Q2  | 120.66      | 56.33     | 257      | 289.93      | 71.87     | 343      | 396.05      | 87.11     | 372      | 487.25      | 93.93     | 280      |
| Y1 Reading MOY Q3  | 173.00      | 71.21     | 304      | 366.21      | 71.60     | 393      | 482.04      | 79.95     | 416      | 575.57      | 102.09    | 339      |
| Y1 Reading MOY Q4  | 322.22      | 102.04    | 309      | 486.58      | 98.92     | 386      | 617.84      | 129.12    | 410      | 754.85      | 158.98    | 367      |
| Y1 Reading MOY All | 159.71      | 113.29    | 1571     | 325.87      | 140.06    | 1630     | 452.85      | 161.03    | 1595     | 560.45      | 191.22    | 1572     |
| Y1 Reading EOY Q1  | 174.00      | 93.15     | 593      | 268.60      | 108.22    | 445      | 336.21      | 117.84    | 276      | 375.26      | 116.91    | 222      |
| Y1 Reading EOY Q2  | 222.75      | 89.41     | 248      | 365.95      | 79.64     | 342      | 449.76      | 92.77     | 366      | 522.83      | 107.23    | 271      |
| Y1 Reading EOY Q3  | 281.91      | 88.46     | 300      | 440.76      | 76.96     | 389      | 541.57      | 87.62     | 404      | 623.15      | 108.44    | 330      |
| Y1 Reading EOY Q4  | 393.74      | 98.87     | 306      | 550.42      | 106.87    | 379      | 675.99      | 135.90    | 402      | 827.64      | 172.52    | 365      |
| Y1 Reading EOY All | 246.54      | 125.72    | 1574     | 397.71      | 143.63    | 1655     | 509.87      | 168.06    | 1607     | 613.94      | 209.23    | 1562     |
| Y2 Reading BOY Q1  | 166.11      | 92.80     | 544      | 245.04      | 101.33    | 404      | 325.15      | 115.59    | 240      | 377.64      | 129.89    | 209      |
| Y2 Reading BOY Q2  | 205.93      | 91.82     | 228      | 346.03      | 81.97     | 316      | 442.15      | 88.60     | 322      | 528.10      | 109.98    | 251      |
| Y2 Reading BOY Q3  | 271.50      | 94.63     | 272      | 428.89      | 90.69     | 346      | 528.48      | 102.41    | 366      | 636.04      | 125.73    | 309      |
| Y2 Reading BOY Q4  | 407.39      | 109.94    | 286      | 556.97      | 120.62    | 352      | 675.93      | 151.00    | 361      | 825.80      | 173.59    | 339      |
| Y2 Reading BOY All | 241.52      | 133.95    | 1441     | 387.63      | 154.74    | 1482     | 505.87      | 172.75    | 1405     | 619.04      | 209.85    | 1433     |
| Y2 Reading MOY Q1  | 245.16      | 115.18    | 549      | 302.50      | 106.70    | 406      | 378.48      | 138.26    | 246      | 431.99      | 126.57    | 208      |
| Y2 Reading MOY Q2  | 293.57      | 114.34    | 231      | 412.00      | 90.44     | 316      | 490.65      | 103.01    | 332      | 582.32      | 116.78    | 251      |
| Y2 Reading MOY Q3  | 353.06      | 100.99    | 273      | 494.15      | 89.16     | 346      | 584.82      | 110.49    | 374      | 702.98      | 129.82    | 309      |
| Y2 Reading MOY Q4  | 482.78      | 106.34    | 285      | 621.37      | 130.64    | 354      | 743.79      | 165.56    | 372      | 901.02      | 171.71    | 339      |
| Y2 Reading MOY All | 321.04      | 143.84    | 1448     | 450.57      | 161.84    | 1488     | 563.81      | 188.51    | 1446     | 679.86      | 216.66    | 1431     |

|                    | Grade 1-2   |           |          | Grade 2-3   |           |          | Grade 3-4   |           |          | Grade 4-5   |           |          |
|--------------------|-------------|-----------|----------|-------------|-----------|----------|-------------|-----------|----------|-------------|-----------|----------|
|                    | <i>Mean</i> | <i>SD</i> | <i>N</i> |
| Y2 Reading EOY Q1  | 320.73      | 130.34    | 550      | 374.33      | 122.04    | 408      | 436.17      | 149.97    | 246      | 488.23      | 143.09    | 206      |
| Y2 Reading EOY Q2  | 366.03      | 115.74    | 231      | 474.77      | 96.57     | 315      | 547.99      | 112.97    | 331      | 623.29      | 122.37    | 250      |
| Y2 Reading EOY Q3  | 424.51      | 98.38     | 273      | 544.37      | 106.02    | 347      | 655.14      | 130.84    | 374      | 759.69      | 150.45    | 309      |
| Y2 Reading EOY Q4  | 530.65      | 112.36    | 286      | 683.89      | 153.34    | 354      | 832.23      | 175.50    | 372      | 959.17      | 174.07    | 338      |
| Y2 Reading EOY All | 389.14      | 144.13    | 1452     | 512.55      | 168.66    | 1489     | 631.07      | 203.17    | 1446     | 734.06      | 226.98    | 1425     |
| Y1 Math BOY Q1     | 125.70      | 73.86     | 186      | 302.44      | 64.18     | 297      | 389.19      | 48.41     | 157      | 459.50      | 80.00     | 127      |
| Y1 Math BOY Q2     | 235.15      | 17.45     | 318      | 385.98      | 16.45     | 386      | 476.29      | 16.45     | 255      | 559.61      | 15.93     | 257      |
| Y1 Math BOY Q3     | 294.15      | 17.52     | 495      | 440.53      | 14.80     | 420      | 526.74      | 14.52     | 347      | 616.37      | 16.37     | 416      |
| Y1 Math BOY Q4     | 373.85      | 42.53     | 527      | 517.34      | 42.68     | 531      | 605.51      | 39.11     | 767      | 691.07      | 37.73     | 746      |
| Y1 Math BOY All    | 288.85      | 88.33     | 1526     | 427.50      | 85.89     | 1634     | 543.75      | 79.41     | 1526     | 630.09      | 79.92     | 1546     |
| Y1 Math MOY Q1     | 295.77      | 77.53     | 176      | 408.38      | 75.77     | 280      | 502.21      | 77.86     | 149      | 530.57      | 88.13     | 119      |
| Y1 Math MOY Q2     | 349.61      | 59.83     | 311      | 474.12      | 56.10     | 371      | 562.94      | 54.90     | 247      | 620.27      | 58.21     | 247      |
| Y1 Math MOY Q3     | 384.23      | 54.61     | 481      | 514.78      | 51.83     | 406      | 601.52      | 45.26     | 336      | 669.76      | 50.50     | 403      |
| Y1 Math MOY Q4     | 444.34      | 61.61     | 522      | 570.88      | 53.94     | 519      | 654.71      | 45.66     | 757      | 733.09      | 53.25     | 732      |
| Y1 Math MOY All    | 384.64      | 79.61     | 1591     | 502.90      | 82.35     | 1639     | 610.54      | 73.21     | 1602     | 678.43      | 87.86     | 1570     |
| Y1 Math EOY Q1     | 370.93      | 74.83     | 174      | 480.44      | 81.75     | 278      | 548.85      | 84.11     | 142      | 573.82      | 89.58     | 109      |
| Y1 Math EOY Q2     | 415.02      | 62.56     | 304      | 539.11      | 55.46     | 363      | 615.69      | 59.89     | 239      | 657.50      | 67.00     | 241      |
| Y1 Math EOY Q3     | 447.52      | 50.18     | 474      | 574.97      | 47.73     | 398      | 649.67      | 50.25     | 332      | 708.29      | 55.58     | 398      |
| Y1 Math EOY Q4     | 506.14      | 60.30     | 512      | 621.68      | 48.81     | 511      | 698.82      | 47.39     | 740      | 773.94      | 52.71     | 721      |
| Y1 Math EOY All    | 449.29      | 75.94     | 1611     | 562.34      | 77.83     | 1653     | 656.29      | 76.23     | 1602     | 720.34      | 85.84     | 1561     |
| Y2 Math BOY Q1     | 346.12      | 78.25     | 152      | 459.89      | 79.91     | 252      | 524.65      | 82.72     | 126      | 566.37      | 90.25     | 100      |
| Y2 Math BOY Q2     | 399.67      | 69.09     | 271      | 520.64      | 60.74     | 335      | 594.73      | 53.64     | 215      | 644.87      | 62.42     | 220      |
| Y2 Math BOY Q3     | 433.12      | 59.99     | 435      | 559.00      | 50.18     | 363      | 626.24      | 47.87     | 304      | 697.04      | 49.96     | 361      |
| Y2 Math BOY Q4     | 499.67      | 68.34     | 472      | 607.37      | 50.43     | 472      | 680.64      | 48.06     | 686      | 755.76      | 53.91     | 670      |
| Y2 Math BOY All    | 437.15      | 84.46     | 1442     | 546.74      | 80.60     | 1488     | 638.00      | 74.12     | 1443     | 706.88      | 81.52     | 1431     |
| Y2 Math MOY Q1     | 408.45      | 86.16     | 153      | 524.60      | 84.56     | 250      | 565.88      | 90.31     | 127      | 610.21      | 104.50    | 99       |
| Y2 Math MOY Q2     | 459.40      | 76.51     | 272      | 584.44      | 54.75     | 336      | 633.34      | 57.90     | 218      | 680.62      | 65.06     | 219      |
| Y2 Math MOY Q3     | 498.35      | 63.90     | 434      | 616.76      | 54.62     | 360      | 671.02      | 54.81     | 304      | 733.21      | 53.72     | 359      |

|                 | Grade 1-2   |           |          | Grade 2-3   |           |          | Grade 3-4   |           |          | Grade 4-5   |           |          |
|-----------------|-------------|-----------|----------|-------------|-----------|----------|-------------|-----------|----------|-------------|-----------|----------|
|                 | <i>Mean</i> | <i>SD</i> | <i>N</i> |
| Y2 Math MOY Q4  | 562.65      | 63.27     | 473      | 664.73      | 51.38     | 470      | 728.64      | 54.19     | 684      | 793.08      | 53.45     | 673      |
| Y2 Math MOY All | 500.37      | 86.85     | 1444     | 606.94      | 79.28     | 1483     | 682.81      | 81.46     | 1445     | 743.83      | 83.28     | 1429     |
| Y2 Math EOY Q1  | 465.17      | 91.84     | 153      | 573.63      | 86.08     | 251      | 612.46      | 89.00     | 125      | 640.85      | 97.47     | 98       |
| Y2 Math EOY Q2  | 518.38      | 79.48     | 271      | 634.01      | 56.96     | 336      | 677.25      | 63.52     | 216      | 709.68      | 64.38     | 218      |
| Y2 Math EOY Q3  | 558.66      | 60.24     | 436      | 667.96      | 49.78     | 363      | 721.59      | 58.25     | 302      | 756.46      | 55.01     | 359      |
| Y2 Math EOY Q4  | 609.14      | 56.32     | 472      | 707.87      | 51.01     | 471      | 772.05      | 52.52     | 685      | 811.52      | 51.85     | 671      |
| Y2 Math EOY All | 555.58      | 82.48     | 1446     | 654.76      | 77.95     | 1486     | 728.60      | 80.57     | 1439     | 766.33      | 80.03     | 1425     |

Table S3

*Descriptive Statistics for Renaissance STAR Reading Scores by Demographic Characteristics*

|                   | <i>N</i> | BOY         |           | MOY         |           | EOY         |           |
|-------------------|----------|-------------|-----------|-------------|-----------|-------------|-----------|
|                   |          | <i>Mean</i> | <i>SD</i> | <i>Mean</i> | <i>SD</i> | <i>Mean</i> | <i>SD</i> |
| <i>Grade 1</i>    |          |             |           |             |           |             |           |
| FRL               | 549      | 60.95       | 53.39     | 113.39      | 83.21     | 187.31      | 106.61    |
| Not FRL           | 977      | 104.74      | 91.47     | 185.79      | 119.52    | 278.26      | 123.73    |
| White             | 821      | 99.00       | 89.60     | 177.74      | 119.54    | 271.87      | 127.08    |
| Other Ethnicities | 711      | 77.19       | 71.80     | 139.19      | 102.02    | 217.55      | 117.72    |
| <i>Grade 2</i>    |          |             |           |             |           |             |           |
| FRL               | 1053     | 177.74      | 109.87    | 256.09      | 126.62    | 321.30      | 135.33    |
| Not FRL           | 2167     | 265.94      | 131.39    | 356.48      | 135.43    | 429.12      | 132.00    |
| White             | 1735     | 262.98      | 134.38    | 353.37      | 138.61    | 428.25      | 134.44    |
| Other Ethnicities | 1505     | 206.47      | 121.02    | 290.24      | 135.44    | 355.55      | 141.17    |
| <i>Grade 3</i>    |          |             |           |             |           |             |           |
| FRL               | 1009     | 315.65      | 140.31    | 371.92      | 148.95    | 428.09      | 155.91    |
| Not FRL           | 2161     | 414.59      | 145.56    | 488.41      | 155.11    | 550.37      | 163.32    |
| White             | 1727     | 412.65      | 149.67    | 484.27      | 158.16    | 548.12      | 164.26    |
| Other Ethnicities | 1443     | 347.72      | 145.12    | 411.62      | 158.78    | 468.48      | 168.23    |
| <i>Grade 4</i>    |          |             |           |             |           |             |           |
| FRL               | 865      | 410.23      | 161.88    | 464.54      | 176.06    | 516.85      | 189.65    |
| Not FRL           | 1935     | 540.94      | 167.63    | 606.94      | 182.10    | 669.48      | 199.06    |
| White             | 1486     | 540.12      | 172.59    | 604.73      | 186.58    | 670.67      | 198.95    |
| Other Ethnicities | 1314     | 455.82      | 170.14    | 512.04      | 186.13    | 566.57      | 205.31    |
| <i>Grade 5</i>    |          |             |           |             |           |             |           |
| FRL               | 468      | 500.85      | 185.77    | 559.99      | 193.52    | 612.24      | 203.21    |
| Not FRL           | 1103     | 665.28      | 201.04    | 724.89      | 212.66    | 778.00      | 226.95    |
| White             | 844      | 664.92      | 207.70    | 724.20      | 218.70    | 782.66      | 232.00    |
| Other Ethnicities | 728      | 559.76      | 199.37    | 619.57      | 208.81    | 666.75      | 217.82    |

Table S4

*Descriptive Statistics for Renaissance STAR Math Scores by Demographic Characteristics*

|                   | BOY      |             |           | MOY         |           | EOY         |           |
|-------------------|----------|-------------|-----------|-------------|-----------|-------------|-----------|
|                   | <i>N</i> | <i>Mean</i> | <i>SD</i> | <i>Mean</i> | <i>SD</i> | <i>Mean</i> | <i>SD</i> |
| <i>Grade 1</i>    |          |             |           |             |           |             |           |
| FRL               | 555      | 257.57      | 90.56     | 353.41      | 76.87     | 415.34      | 75.99     |
| Not FRL           | 971      | 306.72      | 81.87     | 402.60      | 75.54     | 468.50      | 68.89     |
| White             | 814      | 300.74      | 84.06     | 398.61      | 78.33     | 465.39      | 72.03     |
| Other Ethnicities | 712      | 275.26      | 91.15     | 369.16      | 78.19     | 431.70      | 76.24     |
| <i>Grade 2</i>    |          |             |           |             |           |             |           |
| FRL               | 1053     | 396.32      | 83.43     | 465.54      | 83.85     | 522.10      | 85.77     |
| Not FRL           | 2166     | 450.49      | 79.40     | 520.07      | 77.87     | 577.44      | 69.23     |
| White             | 1735     | 448.74      | 81.50     | 521.26      | 79.27     | 577.95      | 70.93     |
| Other Ethnicities | 1506     | 413.84      | 84.45     | 480.69      | 83.69     | 538.71      | 83.06     |
| <i>Grade 3</i>    |          |             |           |             |           |             |           |
| FRL               | 1023     | 510.62      | 84.30     | 573.51      | 81.71     | 623.01      | 84.77     |
| Not FRL           | 2155     | 562.38      | 74.12     | 625.52      | 69.56     | 670.43      | 72.10     |
| White             | 1720     | 560.22      | 76.84     | 623.24      | 71.50     | 668.85      | 74.31     |
| Other Ethnicities | 1458     | 528.60      | 82.91     | 591.87      | 80.93     | 639.48      | 82.38     |
| <i>Grade 4</i>    |          |             |           |             |           |             |           |
| FRL               | 1005     | 597.67      | 87.09     | 637.78      | 95.62     | 682.22      | 97.31     |
| Not FRL           | 2150     | 649.09      | 69.02     | 698.62      | 76.35     | 741.39      | 75.91     |
| White             | 1704     | 645.50      | 74.14     | 696.40      | 79.24     | 739.82      | 80.60     |
| Other Ethnicities | 1451     | 617.70      | 81.77     | 659.41      | 92.58     | 703.76      | 91.10     |
| <i>Grade 5</i>    |          |             |           |             |           |             |           |
| FRL               | 466      | 665.06      | 87.45     | 702.73      | 89.32     | 727.45      | 86.71     |
| Not FRL           | 1099     | 724.27      | 70.48     | 760.09      | 74.65     | 781.58      | 72.06     |
| White             | 840      | 722.99      | 75.76     | 758.20      | 79.04     | 781.64      | 75.11     |
| Other Ethnicities | 725      | 687.69      | 81.92     | 725.35      | 85.08     | 746.93      | 82.63     |

Table S5

*Effect Sizes by Initial Status and Cohort*

|                 | BOY1-MOY1 |           | MOY1-EOY1 |           | BOY1-EOY1 |           | EOY1-BOY2 |           | BOY2-MOY2 |           | MOY2-EOY2 |           | BOY2-EOY2 |           | BOY1-EOY2 |           |
|-----------------|-----------|-----------|-----------|-----------|-----------|-----------|-----------|-----------|-----------|-----------|-----------|-----------|-----------|-----------|-----------|-----------|
|                 | <i>g</i>  | <i>SE</i> |
| Grade 1-2       |           |           |           |           |           |           |           |           |           |           |           |           |           |           |           |           |
| All Reading     | 0.69      | 0.02      | 0.72      | 0.02      | 1.42      | 0.03      | -0.04     | 0.02      | 0.58      | 0.02      | 0.48      | 0.02      | 1.08      | 0.02      | 2.42      | 0.05      |
| Reading <=25th  | 0.55      | 0.06      | 0.67      | 0.05      | 1.25      | 0.07      | -0.06     | 0.03      | 0.58      | 0.03      | 0.54      | 0.03      | 1.14      | 0.04      | 2.41      | 0.11      |
| Reading 26-50th | 0.51      | 0.10      | 0.83      | 0.07      | 1.41      | 0.13      | -0.13     | 0.05      | 0.64      | 0.05      | 0.51      | 0.05      | 1.17      | 0.07      | 2.52      | 0.19      |
| Reading 51-75th | 0.92      | 0.09      | 0.88      | 0.06      | 1.84      | 0.13      | -0.09     | 0.05      | 0.59      | 0.05      | 0.50      | 0.05      | 1.10      | 0.06      | 2.89      | 0.18      |
| Reading >75th   | 1.08      | 0.06      | 0.59      | 0.05      | 1.63      | 0.08      | 0.09      | 0.05      | 0.54      | 0.04      | 0.34      | 0.04      | 0.88      | 0.04      | 2.49      | 0.10      |
| All Math        | 1.18      | 0.03      | 0.84      | 0.02      | 1.99      | 0.04      | -0.17     | 0.02      | 0.73      | 0.02      | 0.65      | 0.02      | 1.41      | 0.02      | 3.16      | 0.06      |
| Math <=25th     | 1.99      | 0.18      | 0.99      | 0.08      | 3.04      | 0.27      | -0.36     | 0.07      | 0.72      | 0.06      | 0.68      | 0.06      | 1.43      | 0.08      | 3.98      | 0.32      |
| Math 26-50th    | 1.35      | 0.11      | 0.85      | 0.06      | 2.23      | 0.14      | -0.20     | 0.05      | 0.69      | 0.05      | 0.71      | 0.05      | 1.43      | 0.07      | 3.35      | 0.20      |
| Math 51-75th    | 1.08      | 0.07      | 0.81      | 0.06      | 1.91      | 0.10      | -0.18     | 0.05      | 0.76      | 0.04      | 0.71      | 0.04      | 1.50      | 0.06      | 3.13      | 0.15      |
| Math >75th      | 0.85      | 0.05      | 0.77      | 0.04      | 1.64      | 0.07      | -0.08     | 0.03      | 0.73      | 0.04      | 0.55      | 0.04      | 1.31      | 0.05      | 2.79      | 0.11      |
| Grade 2-3       |           |           |           |           |           |           |           |           |           |           |           |           |           |           |           |           |
| All Reading     | 0.70      | 0.02      | 0.54      | 0.02      | 1.24      | 0.02      | -0.09     | 0.02      | 0.40      | 0.01      | 0.38      | 0.02      | 0.77      | 0.02      | 1.80      | 0.03      |
| Reading <=25th  | 0.75      | 0.06      | 0.59      | 0.05      | 1.36      | 0.08      | -0.19     | 0.04      | 0.37      | 0.04      | 0.44      | 0.04      | 0.81      | 0.05      | 1.90      | 0.10      |
| Reading 26-50th | 0.82      | 0.08      | 0.55      | 0.06      | 1.38      | 0.10      | -0.14     | 0.07      | 0.42      | 0.06      | 0.38      | 0.05      | 0.79      | 0.07      | 1.95      | 0.12      |
| Reading 51-75th | 0.70      | 0.07      | 0.53      | 0.05      | 1.24      | 0.09      | -0.09     | 0.05      | 0.41      | 0.05      | 0.30      | 0.05      | 0.71      | 0.06      | 1.79      | 0.11      |
| Reading >75th   | 0.53      | 0.05      | 0.45      | 0.05      | 1.00      | 0.06      | 0.05      | 0.05      | 0.41      | 0.04      | 0.38      | 0.04      | 0.79      | 0.05      | 1.77      | 0.08      |
| All Math        | 0.92      | 0.02      | 0.77      | 0.02      | 1.68      | 0.03      | -0.22     | 0.02      | 0.77      | 0.02      | 0.62      | 0.02      | 1.40      | 0.03      | 2.81      | 0.05      |
| Math <=25th     | 1.28      | 0.11      | 0.87      | 0.06      | 2.21      | 0.15      | -0.26     | 0.08      | 0.81      | 0.06      | 0.65      | 0.05      | 1.47      | 0.08      | 3.36      | 0.20      |
| Math 26-50th    | 1.04      | 0.09      | 0.82      | 0.05      | 1.90      | 0.12      | -0.25     | 0.05      | 0.81      | 0.06      | 0.65      | 0.05      | 1.47      | 0.08      | 3.08      | 0.16      |
| Math 51-75th    | 0.87      | 0.07      | 0.76      | 0.06      | 1.67      | 0.10      | -0.21     | 0.07      | 0.75      | 0.06      | 0.66      | 0.05      | 1.41      | 0.08      | 2.83      | 0.15      |
| Math >75th      | 0.63      | 0.05      | 0.63      | 0.04      | 1.29      | 0.06      | -0.20     | 0.04      | 0.74      | 0.05      | 0.56      | 0.05      | 1.31      | 0.06      | 2.35      | 0.10      |
| Grade 3-4       |           |           |           |           |           |           |           |           |           |           |           |           |           |           |           |           |
| All Reading     | 0.51      | 0.02      | 0.36      | 0.02      | 0.88      | 0.02      | -0.05     | 0.02      | 0.32      | 0.02      | 0.35      | 0.02      | 0.65      | 0.02      | 1.34      | 0.03      |
| Reading <=25th  | 0.63      | 0.06      | 0.36      | 0.06      | 1.02      | 0.08      | -0.06     | 0.05      | 0.30      | 0.05      | 0.28      | 0.04      | 0.58      | 0.05      | 1.44      | 0.10      |

|                 | BOY1-MOY1 |           | MOY1-EOY1 |           | BOY1-EOY1 |           | EOY1-BOY2 |           | BOY2-MOY2 |           | MOY2-EOY2 |           | BOY2-EOY2 |           | BOY1-EOY2 |           |
|-----------------|-----------|-----------|-----------|-----------|-----------|-----------|-----------|-----------|-----------|-----------|-----------|-----------|-----------|-----------|-----------|-----------|
|                 | <i>g</i>  | <i>SE</i> |
| Reading 26-50th | 0.56      | 0.07      | 0.33      | 0.05      | 0.91      | 0.08      | -0.06     | 0.05      | 0.28      | 0.05      | 0.29      | 0.05      | 0.56      | 0.06      | 1.33      | 0.09      |
| Reading 51-75th | 0.49      | 0.06      | 0.37      | 0.05      | 0.88      | 0.07      | -0.10     | 0.05      | 0.32      | 0.05      | 0.36      | 0.05      | 0.68      | 0.05      | 1.38      | 0.08      |
| Reading >75th   | 0.40      | 0.05      | 0.34      | 0.04      | 0.77      | 0.05      | 0.02      | 0.04      | 0.38      | 0.04      | 0.44      | 0.04      | 0.81      | 0.05      | 1.52      | 0.08      |
| All Math        | 0.91      | 0.02      | 0.66      | 0.02      | 1.53      | 0.03      | -0.30     | 0.02      | 0.59      | 0.02      | 0.57      | 0.02      | 1.18      | 0.02      | 2.33      | 0.04      |
| Math <=25th     | 1.48      | 0.15      | 0.58      | 0.08      | 2.10      | 0.18      | -0.32     | 0.07      | 0.50      | 0.07      | 0.58      | 0.07      | 1.11      | 0.09      | 2.78      | 0.24      |
| Math 26-50th    | 1.17      | 0.11      | 0.69      | 0.08      | 1.89      | 0.15      | -0.33     | 0.07      | 0.53      | 0.07      | 0.52      | 0.07      | 1.07      | 0.08      | 2.53      | 0.18      |
| Math 51-75th    | 0.99      | 0.08      | 0.67      | 0.06      | 1.68      | 0.12      | -0.36     | 0.06      | 0.59      | 0.06      | 0.63      | 0.05      | 1.25      | 0.07      | 2.47      | 0.14      |
| Math >75th      | 0.65      | 0.04      | 0.58      | 0.04      | 1.25      | 0.05      | -0.26     | 0.04      | 0.63      | 0.04      | 0.55      | 0.04      | 1.20      | 0.04      | 2.11      | 0.07      |
| Grade 4-5       |           |           |           |           |           |           |           |           |           |           |           |           |           |           |           |           |
| All Reading     | 0.36      | 0.02      | 0.26      | 0.02      | 0.60      | 0.02      | 0.02      | 0.02      | 0.30      | 0.02      | 0.24      | 0.02      | 0.53      | 0.02      | 1.13      | 0.03      |
| Reading <=25th  | 0.39      | 0.06      | 0.23      | 0.06      | 0.61      | 0.07      | 0.02      | 0.07      | 0.24      | 0.05      | 0.25      | 0.06      | 0.49      | 0.07      | 1.11      | 0.09      |
| Reading 26-50th | 0.43      | 0.08      | 0.18      | 0.06      | 0.59      | 0.08      | 0.03      | 0.06      | 0.25      | 0.06      | 0.18      | 0.06      | 0.43      | 0.06      | 1.04      | 0.10      |
| Reading 51-75th | 0.38      | 0.07      | 0.23      | 0.05      | 0.60      | 0.07      | 0.06      | 0.06      | 0.31      | 0.05      | 0.25      | 0.05      | 0.56      | 0.06      | 1.22      | 0.09      |
| Reading >75th   | 0.29      | 0.04      | 0.36      | 0.05      | 0.64      | 0.05      | -0.01     | 0.04      | 0.35      | 0.05      | 0.26      | 0.04      | 0.60      | 0.05      | 1.24      | 0.07      |
| All Math        | 0.65      | 0.02      | 0.47      | 0.02      | 1.12      | 0.02      | -0.17     | 0.02      | 0.47      | 0.02      | 0.28      | 0.02      | 0.76      | 0.02      | 1.77      | 0.03      |
| Math <=25th     | 0.79      | 0.12      | 0.42      | 0.08      | 1.30      | 0.15      | -0.03     | 0.08      | 0.52      | 0.07      | 0.43      | 0.08      | 0.98      | 0.10      | 2.33      | 0.24      |
| Math 26-50th    | 0.74      | 0.09      | 0.40      | 0.07      | 1.23      | 0.11      | -0.14     | 0.06      | 0.44      | 0.06      | 0.37      | 0.06      | 0.82      | 0.07      | 1.98      | 0.14      |
| Math 51-75th    | 0.64      | 0.07      | 0.45      | 0.05      | 1.17      | 0.08      | -0.14     | 0.05      | 0.45      | 0.05      | 0.29      | 0.05      | 0.75      | 0.06      | 1.85      | 0.11      |
| Math >75th      | 0.50      | 0.04      | 0.46      | 0.03      | 1.04      | 0.05      | -0.22     | 0.03      | 0.47      | 0.03      | 0.23      | 0.03      | 0.72      | 0.04      | 1.59      | 0.06      |



Table S6

*Effect Sizes by Socio-economic Status and Race/Ethnicity*

|                   | Reading  |           |          |           |          |           | Math     |           |          |           |          |           |
|-------------------|----------|-----------|----------|-----------|----------|-----------|----------|-----------|----------|-----------|----------|-----------|
|                   | BOY-MOY  |           | MOY-EOY  |           | BOY-EOY  |           | BOY-MOY  |           | MOY-EOY  |           | BOY-EOY  |           |
|                   | <i>g</i> | <i>SE</i> |
| Grade 1           |          |           |          |           |          |           |          |           |          |           |          |           |
| FRL               | 0.48     | .03       | 0.61     | .03       | 1.09     | .04       | 1.13     | .04       | 0.79     | .03       | 1.89     | .06       |
| Not FRL           | 0.74     | .02       | 0.76     | .02       | 1.50     | .04       | 1.13     | .03       | 0.85     | .03       | 1.94     | .05       |
| White             | 0.72     | .02       | 0.78     | .02       | 1.50     | .04       | 1.16     | .04       | 0.86     | .03       | 1.98     | .05       |
| Other Ethnicities | 0.57     | .02       | 0.65     | .02       | 1.22     | .04       | 1.11     | .04       | 0.80     | .03       | 1.88     | .05       |
| Grade 2           |          |           |          |           |          |           |          |           |          |           |          |           |
| FRL               | 0.57     | .02       | 0.46     | .02       | 1.04     | .02       | 0.82     | .02       | 0.69     | .02       | 1.53     | .03       |
| Not FRL           | 0.66     | .01       | 0.51     | .01       | 1.18     | .02       | 0.64     | .01       | 0.87     | .02       | 1.53     | .02       |
| White             | 0.66     | .01       | 0.53     | .01       | 1.20     | .02       | 0.86     | .02       | 0.69     | .02       | 1.57     | .02       |
| Other Ethnicities | 0.61     | .01       | 0.46     | .02       | 1.08     | .02       | 0.79     | .02       | 0.71     | .02       | 1.52     | .02       |
| Grade 3           |          |           |          |           |          |           |          |           |          |           |          |           |
| FRL               | 0.36     | .02       | 0.34     | .02       | 0.69     | .02       | 0.79     | .02       | 0.63     | .02       | 1.40     | .03       |
| Not FRL           | 0.47     | .01       | 0.37     | .01       | 0.83     | .01       | 0.79     | .02       | 0.57     | .01       | 1.34     | .02       |
| White             | 0.45     | .01       | 0.38     | .01       | 0.83     | .01       | 0.79     | .02       | 0.58     | .02       | 1.35     | .02       |
| Other Ethnicities | 0.40     | .01       | 0.34     | .01       | 0.74     | .02       | 0.80     | .02       | 0.61     | .02       | 1.38     | .02       |
| Grade 4           |          |           |          |           |          |           |          |           |          |           |          |           |
| FRL               | 0.41     | .02       | 0.27     | .02       | 0.67     | .02       | 0.58     | .02       | 0.51     | .02       | 1.07     | .03       |
| Not FRL           | 0.47     | .01       | 0.31     | .01       | 0.77     | .02       | 0.72     | .02       | 0.54     | .01       | 1.26     | .02       |
| White             | 0.44     | .02       | 0.31     | .02       | 0.74     | .02       | 0.70     | .02       | 0.53     | .02       | 1.21     | .02       |
| Other Ethnicities | 0.42     | .02       | 0.27     | .02       | 0.67     | .02       | 0.59     | .02       | 0.50     | .02       | 1.10     | .03       |
| Grade 5           |          |           |          |           |          |           |          |           |          |           |          |           |
| FRL               | 0.27     | .03       | 0.23     | .03       | 0.50     | .03       | 0.46     | .03       | 0.30     | .03       | 0.77     | .03       |
| Not FRL           | 0.28     | .02       | 0.23     | .02       | 0.50     | .02       | 0.44     | .02       | 0.26     | .02       | 0.71     | .02       |
| White             | 0.27     | .02       | 0.26     | .02       | 0.52     | .02       | 0.43     | .02       | 0.29     | .02       | 0.73     | .02       |

|                   | Reading  |           |          |           |          |           | Math     |           |          |           |          |           |
|-------------------|----------|-----------|----------|-----------|----------|-----------|----------|-----------|----------|-----------|----------|-----------|
|                   | BOY-MOY  |           | MOY-EOY  |           | BOY-EOY  |           | BOY-MOY  |           | MOY-EOY  |           | BOY-EOY  |           |
|                   | <i>g</i> | <i>SE</i> |
| Other Ethnicities | 0.28     | .02       | 0.21     | .02       | 0.48     | .02       | 0.46     | .03       | 0.26     | .03       | 0.73     | .03       |

Table S7

*Demographic Characteristics of Students by Initial Status*

|                |            | % Free/Reduced Lunch |             | % Non-White Ethnicity |             |
|----------------|------------|----------------------|-------------|-----------------------|-------------|
|                |            | <i>Reading</i>       | <i>Math</i> | <i>Reading</i>        | <i>Math</i> |
| <b>Grade 1</b> | Quartile 1 | 47.8                 | 57.5        | 51.6                  | 62.4        |
|                | Quartile 2 | 34.7                 | 41.5        | 45.8                  | 49.7        |
|                | Quartile 3 | 24.2                 | 36.4        | 43.5                  | 46.3        |
|                | Quartile 4 | 14.7                 | 19.3        | 38.9                  | 39.7        |
|                | Total      | 33.9                 | 34.0        | 46.4                  | 46.7        |
| <b>Grade 2</b> | Quartile 1 | 51.9                 | 55.1        | 60.0                  | 60.9        |
|                | Quartile 2 | 35.8                 | 38.4        | 46.8                  | 52.1        |
|                | Quartile 3 | 27.6                 | 30.7        | 39.9                  | 40.0        |
|                | Quartile 4 | 12.4                 | 18.2        | 32.1                  | 36.3        |
|                | Total      | 32.7                 | 32.8        | 45.3                  | 45.5        |
| <b>Grade 3</b> | Quartile 1 | 55.0                 | 63.8        | 60.1                  | 59.9        |
|                | Quartile 2 | 38.7                 | 44.0        | 48.2                  | 56.5        |
|                | Quartile 3 | 24.1                 | 36.7        | 41.4                  | 47.3        |
|                | Quartile 4 | 16.1                 | 19.9        | 34.9                  | 38.5        |
|                | Total      | 31.5                 | 32.1        | 45.0                  | 45.7        |
| <b>Grade 4</b> | Quartile 1 | 65.1                 | 64.4        | 71.8                  | 67.7        |
|                | Quartile 2 | 38.5                 | 50.2        | 55.4                  | 55.6        |
|                | Quartile 3 | 23.4                 | 36.3        | 42.5                  | 48.1        |
|                | Quartile 4 | 15.8                 | 21.0        | 32.7                  | 39.1        |
|                | Total      | 32.6                 | 33.3        | 48.3                  | 46.6        |
| <b>Grade 5</b> | Quartile 1 | 59.7                 | 55.8        | 58.2                  | 58.1        |
|                | Quartile 2 | 37.3                 | 47.4        | 50.9                  | 47.1        |
|                | Quartile 3 | 24.8                 | 35.4        | 42.2                  | 48.5        |
|                | Quartile 4 | 13.6                 | 20.3        | 30.8                  | 38.5        |
|                | Total      | 32.1                 | 32.0        | 44.7                  | 44.5        |
